# Supplementary material
Source: Springer Nature journal article supplement (https://www.springermedizin.de/resource/supplementary/12960_2008_172_MOESM5_ESM.pdf/9570566)

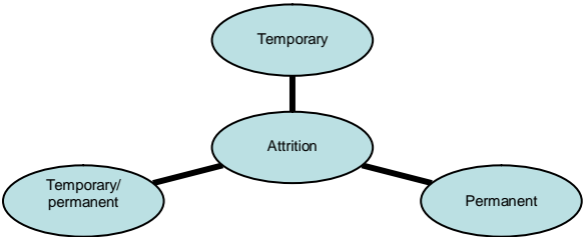

Temporary

Attrition

Temporary/  
permanent

Permanent

Supplement: MOESM5 [file 9570566]
